# Supplementary material for: Serum GDF-15 Levels Accurately Differentiate Patients with Primary Mitochondrial Myopathy, Manifesting with Exercise Intolerance and Fatigue, from Patients with Chronic Fatigue Syndrome
Source: MDPI journal article supplement (doi:10.3390/jcm12062435), 2023-03-22
Supplement: s1 [file s1]

**Supplementary Table 1.** Mutations and genes included in each genetic panel.

| Most common pathogenic variants in mtDNA and <i>POLG</i>                                                                                                                                                                                                                                                                                                                                                                                                                                                                                                                                                                                                                                                                                                                                                                                            |
|-----------------------------------------------------------------------------------------------------------------------------------------------------------------------------------------------------------------------------------------------------------------------------------------------------------------------------------------------------------------------------------------------------------------------------------------------------------------------------------------------------------------------------------------------------------------------------------------------------------------------------------------------------------------------------------------------------------------------------------------------------------------------------------------------------------------------------------------------------|
| <i>MT-RNR1</i> m.1555A>G<br><i>MT-TL1</i> m.3243A>G<br><i>MT-ND1</i> m.3460G>A (p.Ala52Thr)<br><i>MT-TK</i> m.8344A>G<br><i>MT-ATP6</i> m.8993T>G (p.Leu156Arg)<br><i>MT-ATP6</i> m.8993T>C (p.Leu156Pro)<br><i>MT-ATP6</i> m.9176T>C (p.Leu217Pro)<br><i>MT-ATP6</i> m.9176T>G (p.Leu217Arg)<br><i>MT-ND3</i> m.10158T>C (p.Ser34Pro)<br><i>MT-ND3</i> m.10191T>C (p.Ser45Pro)<br><i>MT-ND4</i> m.11777C>A (p.Arg340Ser)<br><i>MT-ND4</i> m.11778G>A (p.Arg340His)<br><i>MT-ND4</i> m.11832G>A (p.Trp358*)<br><i>MT-ND5</i> m.13513G>A (p.Asp393Asn)<br><i>MT-ND5</i> m.13514A>G (p.Asp393Gly)<br><i>MT-ND6</i> m.14459G>A (p.Ala72Val)<br><i>MT-ND6</i> m.14482C>A (p.Met64Ile)<br><i>MT-ND6</i> m.14482C>G (p.Met64Ile)<br><i>MT-ND6</i> m.14484T>C (p.Met64Val)<br><i>MT-ND6</i> m.14487T>C (p.Met63Val)<br><i>POLG</i> c.1399G>A (p.Ala467Thr) |
| mtDNA maintenance panel                                                                                                                                                                                                                                                                                                                                                                                                                                                                                                                                                                                                                                                                                                                                                                                                                             |
| <i>DGUOK</i> , <i>MFN2</i> , <i>MPV17</i> , <i>OPA1</i> , <i>POLG</i> , <i>POLG2</i> , <i>RRM2B</i> , <i>SLC25A4</i> , <i>SUCLA2</i> , <i>SUCLG1</i> , <i>TK2</i> , <i>TWINK</i> , <i>TYMP</i>                                                                                                                                                                                                                                                                                                                                                                                                                                                                                                                                                                                                                                                      |
| Metabolic myopathies panel                                                                                                                                                                                                                                                                                                                                                                                                                                                                                                                                                                                                                                                                                                                                                                                                                          |
| <i>ABHD5</i> , <i>ACADL</i> , <i>ACADM</i> , <i>ACADS</i> , <i>ACADVL</i> , <i>AGL</i> , <i>ALDOA</i> , <i>AMPD1</i> , <i>ATP2A1</i> , <i>CPT1B</i> , <i>CPT2</i> , <i>ENO3</i> , <i>ETFA</i> , <i>ETFB</i> , <i>ETFDH</i> , <i>GBE1</i> , <i>GYG1</i> , <i>GYS1</i> , <i>HADHA</i> , <i>HADHB</i> , <i>LDHA</i> , <i>LPIN1</i> , <i>PFKM</i> , <i>PGAM2</i> , <i>PGM1</i> , <i>PGK1</i> , <i>PHKA1</i> , <i>PHKB</i> , <i>PNPLA2</i> , <i>PYGM</i> , <i>SLC22A5</i> , <i>SLC25A20</i>                                                                                                                                                                                                                                                                                                                                                              |
